# Supplementary material for: CNVpytor: a tool for copy number variation detection and analysis from read depth and allele imbalance in whole-genome sequencing
Source: PubMed Central journal article supplement (PMC8612020; doi:10.1093/gigascience/giab074), 2021-11-18
Supplement: giab074_response_to_reviewer_comments_original_submission.pdf [file giab074_response_to_reviewer_comments_original_submission.pdf]

## Author's Response To Reviewer Comments

Close

Please fine point by point response in one of the supplementary files.

Close
