# Supplementary material for: CNVpytor: a tool for copy number variation detection and analysis from read depth and allele imbalance in whole-genome sequencing
Source: PubMed Central journal article supplement (PMC8612020; doi:10.1093/gigascience/giab074), 2021-11-18
Supplement: giab074_response_to_reviewer_comments_revision_2.pdf [file giab074_response_to_reviewer_comments_revision_2.pdf]

## Author's Response To Reviewer Comments

Close

We have addressed suggested editorial points:

- Supplemental material is updated.
- biotools ID is updated.
- GigaDB dataset is added in references and cited from "data availability" paragraph.

Close
